# Supplementary material for: Background-suppressed live visualization of genomic loci with an improved CRISPR system based on a split fluorophore
Source: PubMed Central journal article supplement — Genome Res. 2020 Sep;30(9):1306–16. doi: 10.1101/gr.260018.119 (PMC7545142; doi:10.1101/gr.260018.119), 2020-09
Supplement: supp_gr.260018.119_Supplemental_Methods.pdf [file supp_gr.260018.119_Supplemental_Methods.pdf]

# Supplemental Methods

## Design of modified sgRNA

We modified sgRNA sequences by adding RNA binding sites to a previous design shown below (Chen et al. 2013). (Annotations: crRNA targeting sequence, **crRNA sequence**, **tracrRNA sequence**, linker sequence – lower case, **MS2 stem-loop**, **termination sequences**)

5'NNNNNNNNNNNNNNNNNNNNNGTTTAAGAGCTATGCTGGAAACAGCATAGCAAGTTTAAATAAGGC TAGTCCGTTATCAACTTGAAAAAGTGGCACCGAGTCGGTGC**TTTTTTT** 3'

## 2×MBS sgRNA

5'NNNNNNNNNNNNNNNNNNNNNGTTTAAGAGCTATGCTGGAAACAGCATAGCAAGTTTAAATAAGGC TAGTCCGTTATCAACTTGAAAAAGTGGCACCGAGTCGGTGCgggagcACATGAGG**ATCACCCATGT**gccacg agcgACATGAGG**ATCACCCATGT**cgctcgtgttccc**TTTTTTT** 3'

## 12×MBS sgRNA: Design 1

5'NNNNNNNNNNNNNNNNNNNNNGTTTGAGAGCTATGCTGGAAACAGCATAGCAAGTTTAAATAAGGC TAGTCCGTTATCAACTTGAAAAAGTGGCACCGAGTCGGTGCtcttCGTACACC**ATCAGGGTACG**tctCAGACACC**ATCAGGGTCTG**tctGGTACAGC**ATCAGCGTACC**tctCGTACAGG**ATCACCCGTACG**tctGCAGCAGG**ATCACCGCTGC**tctCGAGCACG**ATCACGGCTCG**tctGACTCAGC**ATCAGCGAGTC**tctGCTAGAGC**ATCAGCC**TAGCtctCCTTGACC**ATCAGGCAAGG**tctGTCGTAGT**ATCAACACGAC**tctACATGAGG**ATCACCCATGT**tctGCACGAGC**ATCAGCCGTGC****TTTTTTT** 3'

## 12×MBS sgRNA: Design 2

5'NNNNNNNNNNNNNNNNNNNNNGTTTGAGAGCTATGCTGGAAACAGCATAGCAAGTTTAAATAAGGC TAGTCCGTTATCAACTTGAAAAAGTGGCACCGAGTCGGTGCgggagcACATGAGG**ATCACCCATGT**gccacg agcgACATGAGG**ATCACCCATGT**cgctcgtgttcccttCGTAGAGG**ATCACCCCTACG**tctACATGAGG**ATCACCC**ATGTtctGGTAGAGG**ATCACCC**TACCtctCGTAGAGG**ATCACCC**TACGtctGCAGGAGG**ATCACCC**CTGCtctCGAGGAGG**ATCACCC**CTCGtctGACTGAGG**ATCACCC**AGTCtctGCTAGAGG**ATCACCC**TAGCtctCCTTGA**GGATCACCCA**AGGtctGTCGAGG**ATCACCC**CGAC**TTTTTTT** 3'

## 12×MBS sgRNA: Design 3

5'NNNNNNNNNNNNNNNNNNNNNGTTTGAGAGCTAGGCCgggagcACATGAGG**ATCACCCATGT**gccacgag cgACATGAGG**ATCACCCATGT**cgctcgtgttcccttCGTAGAGG**ATCACCC**TACGtctACATGAGG**ATCACCC**ATGTtctGGTAGAGG**ATCACCC**TACCtctCGTAGAGG**ATCACCC**TACGtctGCAGGAGG**ATCACCC**CTGCtctCGAGGAGG**ATCACCC**CTCGtctGACTGAGG**ATCACCC**AGTCtctGCTAGAGG**ATCACCC**TAGCtctCCTTGA**ATCACCCA**AGGGCCTAGCAAGTTTAAATAAGGCTAGTCCGTTATCAACTTGCCAACATGAGG**ATCACCC**ATGTCTGCAGGGCCAAGTGGCACCGAGTCGGTGC**TTTTTTT** 3'

## 12×MBS sgRNA: Design 4

5'NNNNNNNNNNNNNNNNNNNNNGTTTGAGAGCTAGGCCgggagcACATGAGG**ATCACCCATGT**gccacgag cgACATGAGG**ATCACCCATGT**cgctcgtgttcccttCGTAGAGG**ATCACCC**TACGtctACATGAGG**ATCACCC**ATGTtctGGTAGAGG**ATCACCC**TACCtctCGTAGAGG**ATCACCC**TACGtctGCAGGAGG**ATCACCC**CTGCtctCGAGGAGG**ATCACCC**CTCGtctGACTGAGG**ATCACCC**AGTCtctGCTAGAGG**ATCACCC**TAGCtctCCTTGA**AGGATCACCCA**AGGGCCTAGCAAGTTTAAATAAGGCTAGTCCGTTATCAACTTGCCAACATGAGG**ATCACCC**ATGTCTGCAGGGCCAAGTGGCACCGAGTCGGTGC**TTTTTTT** 3'

ATCACCCAAGGGCCTAGCAAGTTGAAATAAGGCTAGTCCGTTATCAACTTGGCCAACATGAGGATC  
ACCCATGTCTGCAGGGCCAAGTGGCACCGAGTCCGGTGC TTTTTT 3'

## Design of CRISPR and Fluorescent Proteins

Split fluorescent proteins were designed by using previously developed split-sfGFP designs (Cabantous et al. 2005, Kim et al. 2011) and further engineering NLS, GB1, MCP, and the SunTag system into the CRISPR system.

### GFP(1-9)-GB1-NLS (Annotations: NLS, GFP1-9, GB1)

5' ATG ccaagaagaagcgcaaggtgatgagaaaaaggagaagaacttttactggaggtgccaattctattgaattagatgggatgtaatgggcacaaattttcg  
tccgtggagagggtgaaggatgctactaattgaaaactctccctaaatftattgcactactgaaaactactgtccgtggccaactgtcactactctgacatg  
gtgtcaatgctttcccgtatccggatcacatgaacggcatgacttttcaagagtgccatcccgaagggtatgtacaggaacgcactatatttcaaatgacggga  
cctacaagacgctgctgaagtcaagttgaaggatgataccttgaatcgtatcaggtaaagggtattgatttaagaagatggaacattctggacacaaactggag  
tacaacttaactacacaaagtatacatcacggcagacaaacaaacaatggaatcaaaactaacaccattcgcacacggtgaagatggtccgtcaactagcag  
accattatcaacaaatactcaattggcgatggccctgtcctttaccaggaggggaggttctgggggagggaggtagtgccggtggtggtcaatcgtggtgagggt  
cggaccgaagatcaagcttactctgaacggtaaaacctgaaagggtgaaaccaccaccgaagctgttgacgctgtaccgcggaaaaagtttcaaacgtagccta  
acgacaacggtgtgacggtgaatgacctacgacgacgctacaaaacctcacggaaccgaaggtggtgtagcgggtggtgtagtcccaagaagaagcgc  
aagggtTAA 3'

### NLS-dCas9-GFP10-GB1-NLS (Annotations: dCas9 underlined, NLS, GFP10, GB1)

5' ATG gctagcccaaaaagaagaggaaagtgacaaagaatfctatcggactggccatcgggactaatagcgtcgggtggccgtgatcactgacgagtacaa  
ggtgccctetaagaagtcaaggtgctcgggaacaccgaccggcattccatcaaaaaatctgacggagctctcctcttfgattcaggggagaccgctgaagcaacc  
gcctcaagcggactgctagacggcgttacaccaggagaaacaccgatttftacttcaagagatattcacaacgaaatggcaaaagctcagcagacagcttctccat  
aggctggaagaatcattctcgtggaagagataaagacatgaacggcattcctcgtgtaatactgctgacgaggtggtcctatcacgaaataccaaccatcta  
ccatctcgcaaaaagctggtgactcaaccgacaagcagacctccgcttactctcctggccctgcccacatgatcaaggtcagaggccacttctgacgagggc  
gacctcaactctgacaatagcgtatgataaactgttcatccagctggtgcagacttacaaaccgctcttgaagagaaccccatcaatgcaagcggagctgatgcaa  
ggcattctgtagccggctgtcaaaagccgcagacttgaaatctatcgtcagctgccgggtgaaaaaataatgactgtcgggaacctgattgctcttactt  
ggcgtgactcccaattcaagttaatttcgacctggcagaggtatccaagctgcaactgtccaaggacacctatgatgacgatctcacaacctctggccagatcggt  
gaccaatagccgaccttctctgctgtaagaatcttctgacgccatctctgctgacattctcggctgaaactgaaatcacaaggccctcttcaactcaatga  
ttaagcggatgatgagcaccaccagacctgacctgctaaaggcactcgtccggcagcagctccggagaagatcaagaaatcttcttgaccagcaagaatgga  
tacccggctacatcagcggaggtgctcccaagaagaatttataagttatcaaacctatcctgagaagatggacggcaccgaagagctcctctgaaactgaatc  
ggagagctgctcggaaagcagcgcacttgcacaatgggagcattcccaccagatccatctggggagcttcacgccatcctcggcgaagaggacttctaccct  
ttcttaaggacaacagggagaagattgagaaaattctacttccgcacccctactacgtgggaccctcggcagagaaatagccggttctgcttgatgaccagaaat  
cagaagaaactatcctcctggaactcgaagaggtggtggacaaaggagccagcctcagtcattcagcaaacggatgactaactcgaataaacctcccattga  
gaaggtcctgccaaacattcctctctacgagctacttaccgtgtacaacgagctgaccaagggtgaaatagtcaccgaaaggatgaggaagcccattcctctcag  
gcaacaaaagaaggaattggaaccttctgttcaagaccaatagaaggtgaccgtgaaagcagctgaaaggagactatttcaagaaaattgaatgctcactctgtg  
gagattagcgggctgaagatcgggtcaacgcaagcctgggtacctaccatgatctgcttaagatcatcaaggacaagatttctggacaatgagagaacgagaca  
tcttgaggacattgctgactctcactctgttcgaggaccgggaaatgatgaggaagagccttaagacctacgccatctgttcgacgataaagtgatgaagcaactta  
aacggagaagatataccggatggggacgccttagccgcaaacctcatcaacggaaatccgggacaacaagagcggaaagaccattctgatttcttaagagcagcggat  
tcgtaatcgaacttcatgcaacttatccatgatgattcctgacctttaaaggagacatccagaagcccaaggtctggtgacaagggtgactcactgcacgagcatatcg  
aaatctggctggtcaccgctttaaagaagggtattctccagaccgtgaaagctggtgacgagctggtcaagggtgatgggtgccataaacagagaacattgtcatcg  
agatggccagggaaaaccagactaccagaagggacagaagaacagcaggggagcggatgaaagaaattgaggaaggattaaaggagctcgggtcacagatcctta  
aagagcaccgggtgaaaaccaccagctcagaatgagaagctctatctgtactacctcaaaatgacgcgatattatgtgaccaagaagcttgatatacaacagcctc  
cagactacgacgtgacgccatcgtccctcagagctcctcaaacgactcaattgacaataaggtgctgactcgtcagacaagaaccgggaaaagtcagataacgt

gcctcagaggagtcgtgaaaaagatgaaactatftggcgccagctctgaacgcaaagctgactactcagcggaggttcgacaatctactaaggctgagagggg  
cggactgagcgaactggacaaagcaggttcattaaacggcaactgtggagactcggcagattactaaacatgctcccaaatcctgactacgcgatgaataccaagt  
acgacgaaaacgacaaacttatcccgaggtgaaagtgattaccctgaagccaagctggtcagcgatttcagaaagacatttcaattctacaaagtgcgggagatcaat  
aactatcatcatgctcatgacgcatactgaatgccgtggggaaccgccctgatcaagaagttaccaaaagctgaaaagcgaattcgtgtacggagactacaaggctca  
cgactgcgcaagatgattgccaaactgagcagagatcgaaaagccaccgcaaaagtacttctctacagcaacatcatgaatttctcaagaccgaaatcccttgc  
aacgggtgagatccggaagggccgctcctcgaactaattggggagactggcgaaatcgtgtgggacaaggcgagagatttcgtaccgtgcaaaagtcttcttat  
gcctcaagtgaacatcgtgaagaaaaccgaggtgcaaacccggagcttttcttaaggatcaatcctcccaagcgaactccgacaagctcattgcaaggaaagga  
ttggaccctaaagaagtagcgcggttcgattaccaactgtgcttattctgctcgtgctgcttaaggtgaaaaagaaaagctaaagagctcaagagcgtgaagg  
aactgctgggatcaccattatggagcgcagctccttcgaagaaccattgacttctcgaagccaagggttacaaggaaagcaagaaggaccttatcatcaagctcc  
caaaagtatagcctgttcgaactggagaatggcgcggaagcggatgctcgcctccgctggcgaactcagaagggtaatgagctggctcccctcgaagtagtgaattc  
ctctaccttcaagccattacgagaagctgaaagggaagcccgaggacaacagcaaaaacactgtttgtggagcagcataagcattatctgacgagatcattgac  
agatttccgatttctaaacgcgtcattctcctgatccaactcgaataagctcttagcgcatacaataagcacagagacaacaaatccggagcagcgtgagaat  
catccactgttaccctcacaactctgtgccccctgccgattcaagtagctcgcaccaccatcgaccggaacgctataccctccacaaaagaagtgctgacgccac  
ctcatccaccagagcatcaccggaacttacgaaactcgattgacctctcacagctcggaggggagtgagggaagctccaagaaaaagcgaaggtaggtagtccctc  
gagatgccaagaaaaagcgaagggtggagggcgtgggtctgggggagggcgtagtgccggtggaggtcaatggacctgcccagcaccactactgtccacc  
cagaccatccttccaaggacctgaacgacgttggtggtgaggatcagaaggagggcgtagggggccctggttgggagggggaaggttctgctgggggaggg  
agcgtggcggggggtctatgatggtggggcgaccgaaggtacaagcttatctgaacggtaaaccttgaaggtgaaaccaccaccgaagctgttgacct  
gctaccgcgaaaaagtttcaaacgtagcgaacgacagctgttgacggtagatggacttacgacgactaccaaaccttccaggtaacgaaagggtggtga  
gcgggtggtgtagtccaagaaagcgaagggtTAA 3'

**MCP-mCherry-GFP(11)-GB1-NLS** (Annotations: MCP underlined, mCherry, NLS, GFP11, GB1)

5' ATGGCTTCTAACTTTACTCAGTTCGTTCTCGTCGACAATGGCGGAACTGGCGACGTGACTGTGCCCC  
AAGCAACTTCGCTAACGGGATCGCTGAATGGATCAGCTCTAACTCGCGTTCACAGGCTTACAAAGTAA  
CCTGTAGCGTTCGTCAGAGCTCTGCGCAGAATCGCAAATACACCATCAAAGTCGAGGTGCCTAAAGGC  
GCCTGGCGTTCGTACTTAAATATGGAACATAACCATTCCAATTTTCGCCACGAATTCGACTGCGAGCTT  
ATTGTTAAGGCAATGCAAGGTCTCTAAAAGATGGAAACCCGATTCCCTCAGCAATCGCAGCAAACCT  
CGCATCTACGCGGATCCACCTGTTGCTACTctcagagatggtgacgaagggcgaggaggataaacatggccatcatcaaggatcatgcg  
cttcaaggtgacacatggaggctccgtgaacggccagagctcgatcaggcgagggcgaggcccccctacgagggcaccagaccgcaagctgaagg  
tgaccaagggtggccccctgccctcctgggacatctgtcccctagttcatgtagcgtccaaggtctacgtgaagcaccgacatccccgactactgaag  
ctgtcttccccgagggctcaagtgaggcgcgtgatgaacttcaggagcggcggtgacctgaccaggaactcctcctcgaggacggcgagtcatctac  
aaggtgaagctgcccggaccaactccccctacgacggcccgtaatgcagaagaagacctgggctgggagcctcctcagagcgtgacccgagacggc  
gcctgaagggcgagatcaagcagagctgaagctgaaggacggagggcactacgacgtgaggtcaagaccactacaaggccaagaagcccgtgacgtgcc  
cgcgctacaacgcaacatcaagttgacatcaccctccacaacaggactacaccatctggaacagtagaacgcccagggccaccctccaccggcgcc  
atgacgagctgtaaacaccggtatgctagatgcccaagaagaagcgaaggtggttccggcgtggcggaagccctggggcgggagcggtggtctgtgtt  
cttctgtagtggcggtcaacatctATGGAGAAGAGAGACCACATGGTGCTGCTAGAGTACGTGACCGCCGACAGAA  
TCACAGACGCtCaggagggcgaggttctggtggaaggcgtagtgccggtgagggtcaatcgatggtggaggtcgaccgaagtagtaacgtttac  
ctgaacggtaaacctgaaaggtgaaaccaccaccgaagctgttgcgctcctaccggaaaaagtttcaaacagtagcctaaccgacaacgggtgtgac  
ggtgaatggacctacgacgctaccaaaaccttaccgtaaccgaaggtggtgtagcgggtggtgtagtccaagaaagcgaagggtTAA 3'

**scFv-GCN4-GFP10-GB1-NLS** (Annotations: GCN4 italicized, HA-tag underlined, NLS, GFP10, GB1)

5' ATGgccccgacatcgtgatgaccagagccccagcagcctgagcgccagcgtggggcaccgctgaccatcacctgccgcagcagcaccggcgccgtg  
accaccagcaactacgccagctgggtgaggagaagcccggcaagctgttcaagggcctgacggcgccaccaacaaccgcccggcggtgccagccgc  
ttcagcggcagcctgacggcgacaagccaccctgaccatcagcagcctgcagcccaggacttcgccactacttctgcccctgtgttacagcaaccactgg  
gtftcggccagggcacaaggtgagctgaagcgggcgggcgggcagcgggcgggcgggcagcagcggcgggcgggcagcagcggcgggcggcagcag  
gtgaagctgctggagagcggcgggcgccctggtgaccccggcgccagcctgaagctgagctgcggctgagcggcttaccctgaccgactacggcgtgaact  
gggtgcaccagggccccggcgccctggagtgatcggtgatctggggcgacggcataccgactacaacagcgcctgaaggaccgcttcatcatcag  
caaggacaacggcaagaacaccgtgtacctgcagatgagcaaggtgcgacgacgacaccgctgtactactgctgacggcctgttctgactactggggc  
cagggcaccctggtgacctgagcagctaccatacgaatgctccagattacgctggtgagggcgagggttctgggggagggaggtagtgccggtggtggtcaggag

gcggcggaagcttggatccaATGcctaagaaaaagcgcaaggtgggagggcgggtggctctggggagggcggtagtggcggtggaggetcaATGGACCTG  
CCCGACGACCACTACCTGTCCACCCAGACCATCCTGTCCAAGGACCTGAACGACGTTGGTGGTGGCGG  
ATCAGAAGGAGGCGGTAGCGGGGGCCCTGGTTTCGGGAGGGGAAGGTTCTGCTGGGGGAGGGAGCGCT  
GGCGGGGGGTCTatcgatggtggaggtcggaccgaagagtacaagcttacctgaacggtaaacctgaaaggtaaacaccaccgaagctgtgacgc  
tgctaccgcgaaaaagtttcaaacagtacgtaacgacaacgggtgtgacggtgaatggacctacgacgacgtacaaaacctcacgtaaccgaaggtggt  
agcgggtggtactagtccaagaagaagcgcaagggtTAA 3'

## References

- Cabantous S, Terwilliger TC, Waldo GS. 2005. Protein tagging and detection with engineered self-assembling fragments of green fluorescent protein. *Nat Biotechnol* **23**: 102–107.
- Chen B, Gilbert LA, Cimini BA, Schnitzbauer J, Zhang W, Li GW, Park J, Blackburn EH, Weissman JS, Qi LS, et al. 2013. Dynamic imaging of genomic loci in living human cells by an optimized CRISPR/Cas system. *Cell* **155**: 1479–1491.
- Kim J, Zhao T, Petralia RS, Yu Y, Peng H, Myers E, Magee JC. 2011. mGRASP enables mapping mammalian synaptic connectivity with light microscopy. *Nat Methods* **9**: 96–102.
